# Supplementary material
Source: PubMed Central journal article supplement (PMC9992093)
Supplement: NIHMS1854451-supplement-supinfo.pdf [file NIHMS1854451-supplement-supinfo.pdf]

## Supporting Information

### **Abundant co-pathologies of polyglucosan bodies, frontotemporal lobar degeneration with TDP-43 inclusions, and aging-related tau astrogliopathy in a family with *GBE1* mutation**

Maiko T Uemura<sup>1,2</sup>, EunRan Suh<sup>1,2</sup>, John L Robinson<sup>1,2</sup>, Kurt R Brunden<sup>1,2</sup>, Murray Grossman<sup>3,4</sup>, David Irwin<sup>3,4,5</sup>, Virginia M -Y Lee<sup>1,2</sup>, John Q Trojanowski<sup>1,2</sup>, Edward B Lee<sup>1,2,6</sup>, and Vivianna M Van Deerlin<sup>1,2</sup>

1. Center for Neurodegenerative Disease Research, Perelman school of medicine at the University of Pennsylvania, Philadelphia, PA, USA

2. Department of Pathology and Laboratory Medicine, Perelman School of Medicine at the University of Pennsylvania, Philadelphia, PA, USA

3. Department of Neurology, Perelman School of Medicine at the University of Pennsylvania , Philadelphia, PA, USA

4. Penn Frontotemporal Degeneration Center, Perelman School of Medicine at the University of Pennsylvania , Philadelphia, PA, USA

5. Penn Digital Neuropathology Laboratory, Department of Neurology, Perelman School of Medicine at the University of Pennsylvania, Philadelphia, PA, USA.

6. Translational Neuropathology Research Laboratory, Department of Pathology and Laboratory Medicine, Perelman School of Medicine at the University of Pennsylvania, PA, USA.

\*Correspondence to:

Vivianna M Van Deerlin,

Vivianna.Vandeerlin@pennmedicine.upenn.edu

Edward B Lee,

Edward.Lee@pennmedicine.upenn.edu

**Supplementary Table S1. Variants present in all affected siblings and absent in unaffected siblings.**

| <b>GENE</b>  | <b>HGVS Coding</b> | <b>HGVC Protein</b> | <b>Type</b>       | <b>Mutation Taster</b> | <b>Polyphen2</b> | <b>CADD_Phred</b>      | <b>SIFT</b> |
|--------------|--------------------|---------------------|-------------------|------------------------|------------------|------------------------|-------------|
| <i>GBE1</i>  | c.1280delG         | p.Gly427Glufs*9     | Frameshift<br>LOF | NA                     | NA               | NA                     | NA          |
| <i>PRKG2</i> | c.1265C>T          | p.Ser422Phe         | Missense          | Disease causing        | Benign           | 20.6<br>Likely benign  | Deleterious |
| <i>IL1R2</i> | c.430T>G           | p.Leu144Val         | Missense          | Polymorphism           | Benign           | 0.039<br>Likely benign | Tolerated   |
| <i>EPAS1</i> | c.2272G>A          | p.Ala758Thr         | Missense          | Polymorphism           | Benign           | 1.749<br>Likely benign | Tolerated   |

**Supplementary Table S2. Cases used for western blotting.**

|           | Age | Sex | NPDx                                     | GBE1<br>expression |
|-----------|-----|-----|------------------------------------------|--------------------|
| II-1      | ~75 | -   | APBD / FTLD-TDP / low ADNC / HS / ARTAG  | 40.0 %             |
| II-5      | ~75 | -   | APBD / FTLD-TDP / high ADNC / HS / ARTAG | 17.6 %             |
| Control 1 | 70  | M   | Unremarkable brain                       |                    |
| Control 2 | 66  | M   | Unremarkable brain                       |                    |
| Control 3 | 76  | M   | PART                                     |                    |
| Control 4 | 72  | F   | PART                                     |                    |
| Control 5 | 72  | F   | PART                                     |                    |

*Abbreviations; ADNC, Alzheimer's disease neuropathologic change; AGD, Argyrophilic grain disease; APBD, adult polyglucosan body disease, ARTAG, Aging-related tau astroglipathy; FTLD-TDP, Frontotemporal lobar degeneration with TDP-43 inclusions, HS, hippocampal sclerosis; PART, primary age-related tauopathy.*

**Supplementary Table S3. PBs, TDP-43, and ARTAG co-pathologies in II-1 and II-5.**

|                                |     | PBs  |      | TDP-43 |      | ARTAG |      |
|--------------------------------|-----|------|------|--------|------|-------|------|
|                                |     | II-1 | II-5 | II-1   | II-5 | II-1  | II-5 |
| Amygdala                       | GM  | -    | ±    | ++     | +++  | +     | -    |
|                                | WM  | +++  | +++  | -      | -    | +++   | +++  |
|                                | SVZ | -    | +    | -      | -    | +     | +    |
| Dentate Gyrus                  | GM  | +    | +    | +      | +    | -     | ++   |
|                                | WM  | +    | +++  | -      | -    | -     | +++  |
| Cornu Ammonis                  | GM  | +    | -    | +      | +    | -     | +    |
|                                | WM  | +++  | +++  | -      | -    | +++   | +++  |
|                                | SPM | ++   | ++   | -      | -    | -     | ++   |
| Entorhinal Cortex              | GM  | +    | -    | ++     | +++  | -     | ±    |
|                                | WM  | +++  | +++  | -      | -    | -     | +++  |
|                                | SPM | +    | ++   | -      | -    | -     | ++   |
| Cingulate Gyrus                | GM  | -    | -    | +      | +    | -     | -    |
|                                | WM  | ++   | ++   | -      | -    | -     | ++   |
|                                | SPM | ++   | +    | -      | -    | +     | ++   |
| Middle Frontal Gyrus           | GM  | -    | -    | +++    | +    | -     | -    |
|                                | WM  | +    | +++  | -      | -    | -     | +++  |
|                                | SPM | +    | +    | -      | -    | -     | +    |
| Motor Cortex                   | GM  | -    | -    | +      | +    | -     | -    |
|                                | WM  | ++   | ++   | -      | -    | -     | ++   |
|                                | SPM | +++  | ++   | -      | -    | +     | +    |
| Angular Gyrus                  | GM  | -    | -    | +      | ++   | -     | -    |
|                                | WM  | ++   | ++   | -      | -    | -     | ++   |
|                                | SPM | +++  | +++  | -      | -    | ±     | +    |
| Superior/Middle Temporal Gyrus | GM  | -    | -    | +++    | +++  | -     | -    |
|                                | WM  | +    | +++  | -      | -    | -     | +++  |
|                                | SPM | ++   | ++   | -      | -    | ++    | ++   |
| Occipital lobes                | GM  | -    | -    | +      | -    | -     | -    |
|                                | WM  | ++   | +++  | -      | -    | -     | -    |
|                                | SPM | +++  | +++  | -      | -    | +     | +    |
| Striatum                       | GM  | -    | +    | +      | +    | -     | -    |
|                                | WM  | +    | +++  | -      | -    | ++    | ++   |
|                                | SVZ | +    | ++   | -      | -    | ++    | +++  |
| Thalamus                       | GM  | -    | -    | ++     | ±    | -     | -    |
|                                | WM  | ++   | ++   | -      | -    | +     | +++  |
|                                | SVZ | ++   | +++  | -      | -    | +     | +++  |

|                      |     |     |    |   |   |    |     |
|----------------------|-----|-----|----|---|---|----|-----|
| Midbrain             | GM  | -   | -  | + | - | -  | -   |
|                      | WM  | ++  | ++ | - | - | ++ | +   |
|                      | SPM | ++  | ++ | - | - | ++ | +++ |
| Pons                 | GM  | -   | +  | - | - | -  | -   |
|                      | WM  | ++  | +  | - | - | +  | +   |
|                      | SPM | ++  | ++ | - | - | ++ | ++  |
| Medulla              | GM  | ++  | ++ | + | + | ++ | -   |
|                      | WM  | ++  | ++ | - | - | ++ | ++  |
|                      | SPM | ++  | ++ | - | - | +  | +++ |
| Cerebellum           | GM  | ±   | +  | - | - | -  | -   |
|                      | WM  | +++ | ++ | - | - | -  | ±   |
|                      | SPM | -   | -  | - | - | -  | -   |
| Cervical Spinal Cord | GM  | +   | ±  | + | + | ++ | -   |
|                      | WM  | ++  | +  | - | - | -  | -   |
|                      | SPM | ±   | +  | - | - | -  | -   |

*Abbreviations; GM, gray matter; SPM, subpial matter; SVZ, subventricular zone, WM, white matter*

**Supplementary Figure S1. White matter attenuation in II-1 and II-5**

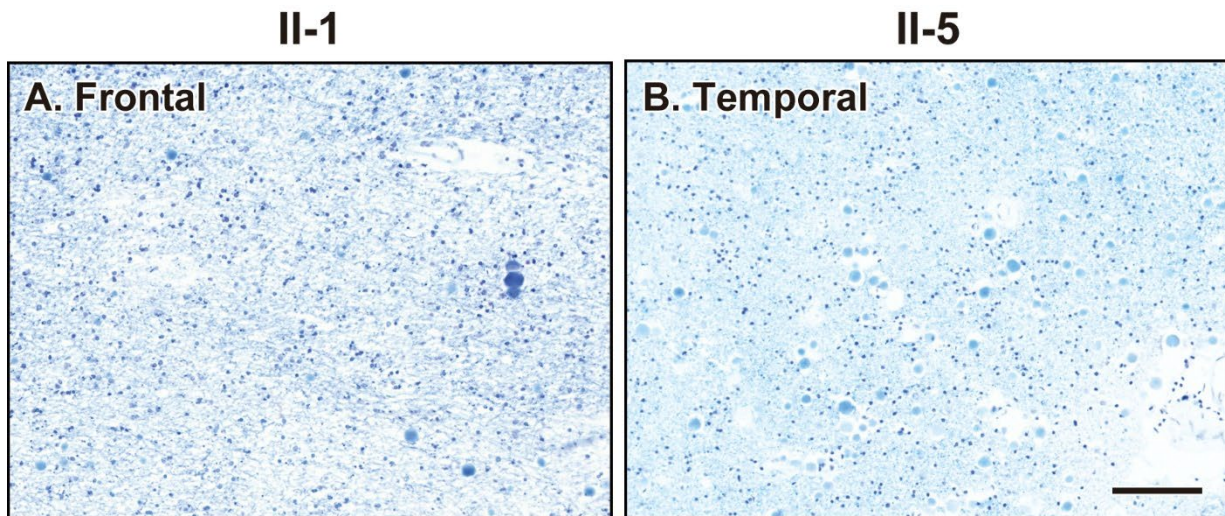

Klüver-Barrera (KB) staining of (A) II-1 (frontal lobe, white matter) and (B) II-5 (temporal lobe, white matter). Severe white matter damage with loss of myelinated structures is observed in both cases.
